# Supplementary material
Source: MDPI journal article supplement (https://www.mdpi.com/1424-2818/13/5/205)
Supplement: s1 [file s1]

**Table S1.** Occurrences of *Petrocoptis montsicciana* and *P. pardoii* used in the niche analyses. The geographic location is provided as UTM (Universal Transverse Mercator) coordinate system and the traditional latitude/longitude system.

| Species                | UTM 1 × 1 km | Lat/Long       | Source                                                                                                                    |
|------------------------|--------------|----------------|---------------------------------------------------------------------------------------------------------------------------|
| <i>P. montsicciana</i> | 31TBG9939    | 41.882 / 0.584 | <i>Atlas y Libro Rojo de la Flora Vascular Amenazada de España</i> [1]; previous study of allozymes [2]; LIFE RESECOM [3] |
| <i>P. montsicciana</i> | 31TCG0250    | 41.982 / 0.616 | <i>Atlas y Libro Rojo de la Flora Vascular Amenazada de España</i> [1]; LIFE RESECOM [3]                                  |
| <i>P. montsicciana</i> | 31TCG0293    | 42.369 / 0.601 | <i>Atlas y Libro Rojo de la Flora Vascular Amenazada de España</i> [1]; LIFE RESECOM [3]                                  |
| <i>P. montsicciana</i> | 31TCG0459    | 42.063 / 0.637 | <i>Atlas y Libro Rojo de la Flora Vascular Amenazada de España</i> [1]; LIFE RESECOM [3]                                  |
| <i>P. montsicciana</i> | 31TCG0460    | 42.072 / 0.637 | <i>Atlas y Libro Rojo de la Flora Vascular Amenazada de España</i> [1]; LIFE RESECOM [3]                                  |
| <i>P. montsicciana</i> | 31TCG0461    | 42.081 / 0.636 | <i>Atlas y Libro Rojo de la Flora Vascular Amenazada de España</i> [1]; LIFE RESECOM [3]                                  |
| <i>P. montsicciana</i> | 31TCG0552    | 42.001 / 0.652 | <i>Atlas y Libro Rojo de la Flora Vascular Amenazada de España</i> [1]; LIFE RESECOM [3]                                  |
| <i>P. montsicciana</i> | 31TCG0554    | 42.019 / 0.651 | <i>Atlas y Libro Rojo de la Flora Vascular Amenazada de España</i> [1]; LIFE RESECOM [3]                                  |
| <i>P. montsicciana</i> | 31TCG0559    | 42.064 / 0.649 | <i>Atlas y Libro Rojo de la Flora Vascular Amenazada de España</i> [1]; previous study of allozymes [2]; LIFE RESECOM [3] |
| <i>P. montsicciana</i> | 31TCG0560    | 42.073 / 0.649 | <i>Atlas y Libro Rojo de la Flora Vascular Amenazada de España</i> [1]; LIFE RESECOM [3]                                  |
| <i>P. montsicciana</i> | 31TCG0561    | 42.082 / 0.649 | <i>Atlas y Libro Rojo de la Flora Vascular Amenazada de España</i> [1]; LIFE RESECOM [3]                                  |
| <i>P. montsicciana</i> | 31TCG0654    | 42.019 / 0.663 | Previous study of allozymes [2]                                                                                           |
| <i>P. montsicciana</i> | 31TCG0657    | 42.046 / 0.662 | <i>Atlas y Libro Rojo de la Flora Vascular Amenazada de España</i> [1]; LIFE RESECOM [3]                                  |
| <i>P. montsicciana</i> | 31TCG0658    | 42.055 / 0.662 | <i>Atlas y Libro Rojo de la Flora Vascular Amenazada de España</i> [1]; LIFE RESECOM [3]                                  |
| <i>P. montsicciana</i> | 31TCG0659    | 42.064 / 0.661 | <i>Atlas y Libro Rojo de la Flora Vascular Amenazada de España</i> [1]; previous study of allozymes [2]; LIFE RESECOM [3] |
| <i>P. montsicciana</i> | 31TCG0660    | 42.073 / 0.661 | <i>Atlas y Libro Rojo de la Flora Vascular Amenazada de España</i> [1]; LIFE RESECOM [3]                                  |
| <i>P. montsicciana</i> | 31TCG0757    | 42.046 / 0.674 | <i>Atlas y Libro Rojo de la Flora Vascular Amenazada de España</i> [1]; previous study of allozymes [2]; LIFE RESECOM [3] |
| <i>P. montsicciana</i> | 31TCG0758    | 42.055 / 0.674 | Previous study of allozymes [2]; LIFE RESECOM [3]                                                                         |
| <i>P. montsicciana</i> | 31TCG0759    | 42.064 / 0.673 | <i>Atlas y Libro Rojo de la Flora Vascular Amenazada de España</i> [1]; previous study of allozymes [2]; LIFE RESECOM [3] |
| <i>P. montsicciana</i> | 31TCG0760    | 42.073 / 0.673 | <i>Atlas y Libro Rojo de la Flora Vascular Amenazada de España</i> [1]; previous study of allozymes [2]; LIFE RESECOM [3] |

|                        |           |                |                                                                                                                           |
|------------------------|-----------|----------------|---------------------------------------------------------------------------------------------------------------------------|
| <i>P. montsicciana</i> | 31TCG0761 | 42.082 / 0.673 | <i>Atlas y Libro Rojo de la Flora Vascular Amenazada de España</i> [1]; LIFE RESECOM [3]                                  |
| <i>P. montsicciana</i> | 31TCG0860 | 42.073 / 0.685 | <i>Atlas y Libro Rojo de la Flora Vascular Amenazada de España</i> [1]; previous study of allozymes [2]; LIFE RESECOM [3] |
| <i>P. montsicciana</i> | 31TCG0861 | 42.082 / 0.685 | <i>Atlas y Libro Rojo de la Flora Vascular Amenazada de España</i> [1]; previous study of allozymes [2]; LIFE RESECOM [3] |
| <i>P. montsicciana</i> | 31TCG0862 | 42.091 / 0.684 | <i>Atlas y Libro Rojo de la Flora Vascular Amenazada de España</i> [1]; LIFE RESECOM [3]                                  |
| <i>P. montsicciana</i> | 31TCG0863 | 42.100 / 0.684 | <i>Atlas y Libro Rojo de la Flora Vascular Amenazada de España</i> [1]; LIFE RESECOM [3]                                  |
| <i>P. montsicciana</i> | 31TCG0963 | 42.101 / 0.696 | <i>Atlas y Libro Rojo de la Flora Vascular Amenazada de España</i> [1]; LIFE RESECOM [3]                                  |
| <i>P. montsicciana</i> | 31TCG1756 | 42.040 / 0.795 | <i>Atlas y Libro Rojo de la Flora Vascular Amenazada de España</i> [1]; previous study of allozymes [2]                   |
| <i>P. montsicciana</i> | 31TCG1960 | 42.076 / 0.818 | <i>Atlas y Libro Rojo de la Flora Vascular Amenazada de España</i> [1]; previous study of allozymes [2]                   |
| <i>P. montsicciana</i> | 31TCG2038 | 41.878 / 0.837 | Previous study of allozymes [2]                                                                                           |
| <i>P. montsicciana</i> | 31TCG2054 | 42.022 / 0.832 | Previous study of allozymes [2]                                                                                           |
| <i>P. montsicciana</i> | 31TCG2059 | 42.067 / 0.830 | Previous study of allozymes [2]                                                                                           |
| <i>P. montsicciana</i> | 31TCG2138 | 41.878 / 0.849 | <i>Atlas y Libro Rojo de la Flora Vascular Amenazada de España</i> [1]; previous study of allozymes [2]                   |
| <i>P. montsicciana</i> | 31TCG2440 | 41.897 / 0.884 | <i>Atlas y Libro Rojo de la Flora Vascular Amenazada de España</i> [1]; previous study of allozymes [2]                   |
| <i>P. montsicciana</i> | 31TCG2441 | 41.906 / 0.884 | <i>Atlas y Libro Rojo de la Flora Vascular Amenazada de España</i> [1]; previous study of allozymes [2]                   |
| <i>P. montsicciana</i> | 31TCG2455 | 42.032 / 0.880 | <i>Atlas y Libro Rojo de la Flora Vascular Amenazada de España</i> [1]; previous study of allozymes [2]                   |
| <i>P. montsicciana</i> | 31TCG2456 | 42.041 / 0.880 | <i>Atlas y Libro Rojo de la Flora Vascular Amenazada de España</i> [1]; previous study of allozymes [2]                   |
| <i>P. montsicciana</i> | 31TCG2540 | 41.897 / 0.896 | <i>Atlas y Libro Rojo de la Flora Vascular Amenazada de España</i> [1]; previous study of allozymes [2]                   |
| <i>P. montsicciana</i> | 31TCG2541 | 41.906 / 0.896 | <i>Atlas y Libro Rojo de la Flora Vascular Amenazada de España</i> [1]; previous study of allozymes [2]                   |
| <i>P. montsicciana</i> | 31TCG2556 | 42.041 / 0.892 | <i>Atlas y Libro Rojo de la Flora Vascular Amenazada de España</i> [1]; previous study of allozymes [2]                   |
| <i>P. montsicciana</i> | 31TCG2557 | 42.050 / 0.891 | <i>Atlas y Libro Rojo de la Flora Vascular Amenazada de España</i> [1]; previous study of allozymes [2]                   |
| <i>P. montsicciana</i> | 31TCG2558 | 42.059 / 0.891 | <i>Atlas y Libro Rojo de la Flora Vascular Amenazada de España</i> [1]; previous study of allozymes [2]                   |
| <i>P. montsicciana</i> | 31TCG2642 | 41.916 / 0.908 | <i>Atlas y Libro Rojo de la Flora Vascular Amenazada de España</i> [1]; previous study of allozymes [2]                   |
| <i>P. montsicciana</i> | 31TCG2741 | 41.907 / 0.920 | <i>Atlas y Libro Rojo de la Flora Vascular Amenazada de España</i> [1]; previous study of allozymes [2]                   |

|                        |           |                 |                                                                                                         |
|------------------------|-----------|-----------------|---------------------------------------------------------------------------------------------------------|
| <i>P. montsicciana</i> | 31TCG2742 | 41.916 / 0.920  | <i>Atlas y Libro Rojo de la Flora Vascular Amenazada de España</i> [1]; previous study of allozymes [2] |
| <i>P. montsicciana</i> | 31TCG2841 | 41.907 / 0.932  | <i>Atlas y Libro Rojo de la Flora Vascular Amenazada de España</i> [1]; previous study of allozymes [2] |
| <i>P. montsicciana</i> | 31TCG3341 | 41.908 / 0.992  | <i>Atlas y Libro Rojo de la Flora Vascular Amenazada de España</i> [1]; previous study of allozymes [2] |
| <i>P. montsicciana</i> | 31TCG3540 | 41.900 / 1.017  | <i>Atlas y Libro Rojo de la Flora Vascular Amenazada de España</i> [1]; previous study of allozymes [2] |
| <i>P. montsicciana</i> | 31TCG6364 | 42.121 / 1.349  | <i>Atlas y Libro Rojo de la Flora Vascular Amenazada de España</i> [1]                                  |
| <i>P. montsicciana</i> | 31TCG6465 | 42.130 / 1.361  | <i>Atlas y Libro Rojo de la Flora Vascular Amenazada de España</i> [1]; previous study of allozymes [2] |
| <i>P. montsicciana</i> | 31TCG0558 | 42.055 / 0.650  | LIFE RESECOM [3]                                                                                        |
| <i>P. montsicciana</i> | 31TCG0754 | 42.019 / 0.675  | LIFE RESECOM [3]                                                                                        |
| <i>P. montsicciana</i> | 31TCG0858 | 42.055 / 0.686  | LIFE RESECOM [3]                                                                                        |
| <i>P. montsicciana</i> | 31TCG0859 | 42.064 / 0.685  | LIFE RESECOM [3]                                                                                        |
| <i>P. montsicciana</i> | 31TCG0959 | 42.065 / 0.697  | LIFE RESECOM [3]                                                                                        |
| <i>P. montsicciana</i> | 31TCG0960 | 42.074 / 0.697  | LIFE RESECOM [3]                                                                                        |
| <i>P. montsicciana</i> | 31TCG0661 | 42.082 / 0.661  | LIFE RESECOM [3]                                                                                        |
| <i>P. montsicciana</i> | 31TCG0961 | 42.083 / 0.697  | LIFE RESECOM [3]                                                                                        |
| <i>P. montsicciana</i> | 31TCG0762 | 42.091 / 0.672  | LIFE RESECOM [3]                                                                                        |
| <i>P. montsicciana</i> | 31TCG0962 | 42.092 / 0.697  | LIFE RESECOM [3]                                                                                        |
| <i>P. montsicciana</i> | 31TCG0864 | 42.109 / 0.684  | LIFE RESECOM [3]                                                                                        |
| <i>P. pardoi</i>       | 30TYL3614 | 40.748 / -0.199 | BDBV ( <a href="http://www.bdb.gva.es/">http://www.bdb.gva.es/</a> ); previous study of allozymes [2]   |
| <i>P. pardoi</i>       | 30TYL3615 | 40.757 / 0.198  | BDBV ( <a href="http://www.bdb.gva.es/">http://www.bdb.gva.es/</a> ); previous study of allozymes [2]   |
| <i>P. pardoi</i>       | 30TYL3616 | 40.766 / -0.198 | BDBV ( <a href="http://www.bdb.gva.es/">http://www.bdb.gva.es/</a> ); previous study of allozymes [2]   |
| <i>P. pardoi</i>       | 30TYL3714 | 40.747 / -0.187 | BDBV ( <a href="http://www.bdb.gva.es/">http://www.bdb.gva.es/</a> ); previous study of allozymes [2]   |
| <i>P. pardoi</i>       | 30TYL3715 | 40.756 / -0.187 | BDBV ( <a href="http://www.bdb.gva.es/">http://www.bdb.gva.es/</a> ); previous study of allozymes [2]   |
| <i>P. pardoi</i>       | 30TYL3716 | 40.765 / -0.186 | BDBV ( <a href="http://www.bdb.gva.es/">http://www.bdb.gva.es/</a> ); previous study of allozymes [2]   |
| <i>P. pardoi</i>       | 30TYL3717 | 40.774 / -0.186 | BDBV ( <a href="http://www.bdb.gva.es/">http://www.bdb.gva.es/</a> ); previous study of allozymes [2]   |
| <i>P. pardoi</i>       | 30TYL3811 | 40.720 / -0.176 | BDBV ( <a href="http://www.bdb.gva.es/">http://www.bdb.gva.es/</a> ); previous study of allozymes [2]   |
| <i>P. pardoi</i>       | 30TYL3814 | 40.747 / -0.175 | BDBV ( <a href="http://www.bdb.gva.es/">http://www.bdb.gva.es/</a> ); previous study of allozymes [2]   |
| <i>P. pardoi</i>       | 30TYL3815 | 40.756 / -0.175 | BDBV ( <a href="http://www.bdb.gva.es/">http://www.bdb.gva.es/</a> ); previous study of allozymes [2]   |

|                   |           |                 |                                                                                                       |
|-------------------|-----------|-----------------|-------------------------------------------------------------------------------------------------------|
| <i>P. pardoii</i> | 30TYL3816 | 40.765 / -0.174 | BDBV ( <a href="http://www.bdb.gva.es/">http://www.bdb.gva.es/</a> ); previous study of allozymes [2] |
| <i>P. pardoii</i> | 30TYL3817 | 40.774 / -0.174 | BDBV ( <a href="http://www.bdb.gva.es/">http://www.bdb.gva.es/</a> ); previous study of allozymes [2] |
| <i>P. pardoii</i> | 30TYL3818 | 40.783 / -0.174 | BDBV ( <a href="http://www.bdb.gva.es/">http://www.bdb.gva.es/</a> ); previous study of allozymes [2] |
| <i>P. pardoii</i> | 30TYL3819 | 40.792 / -0.173 | Previous study of allozymes [2]                                                                       |
| <i>P. pardoii</i> | 30TYL3914 | 40.747 / -0.163 | BDBV ( <a href="http://www.bdb.gva.es/">http://www.bdb.gva.es/</a> )                                  |
| <i>P. pardoii</i> | 30TYL3915 | 40.756 / -0.163 | BDBV ( <a href="http://www.bdb.gva.es/">http://www.bdb.gva.es/</a> )                                  |
| <i>P. pardoii</i> | 30TYL3916 | 40.765 / -0.162 | BDBV ( <a href="http://www.bdb.gva.es/">http://www.bdb.gva.es/</a> ); previous study of allozymes [2] |
| <i>P. pardoii</i> | 30TYL3917 | 40.774 / -0.162 | BDBV ( <a href="http://www.bdb.gva.es/">http://www.bdb.gva.es/</a> ); previous study of allozymes [2] |
| <i>P. pardoii</i> | 30TYL3918 | 40.783 / -0.162 | BDBV ( <a href="http://www.bdb.gva.es/">http://www.bdb.gva.es/</a> ); previous study of allozymes [2] |
| <i>P. pardoii</i> | 30TYL4015 | 40.755 / -0.151 | BDBV ( <a href="http://www.bdb.gva.es/">http://www.bdb.gva.es/</a> ); previous study of allozymes [2] |
| <i>P. pardoii</i> | 30TYL4016 | 40.764 / -0.151 | BDBV ( <a href="http://www.bdb.gva.es/">http://www.bdb.gva.es/</a> ); previous study of allozymes [2] |
| <i>P. pardoii</i> | 30TYL4017 | 40.773 / -0.150 | BDBV ( <a href="http://www.bdb.gva.es/">http://www.bdb.gva.es/</a> ); previous study of allozymes [2] |
| <i>P. pardoii</i> | 30TYL4018 | 40.782 / -0.150 | BDBV ( <a href="http://www.bdb.gva.es/">http://www.bdb.gva.es/</a> ); previous study of allozymes [2] |
| <i>P. pardoii</i> | 30TYL4019 | 40.791 / -0.150 | BDBV ( <a href="http://www.bdb.gva.es/">http://www.bdb.gva.es/</a> ); previous study of allozymes [2] |
| <i>P. pardoii</i> | 30TYL4115 | 40.755 / -0.139 | BDBV ( <a href="http://www.bdb.gva.es/">http://www.bdb.gva.es/</a> ); previous study of allozymes [2] |
| <i>P. pardoii</i> | 30TYL4116 | 40.764 / -0.139 | BDBV ( <a href="http://www.bdb.gva.es/">http://www.bdb.gva.es/</a> ); previous study of allozymes [2] |
| <i>P. pardoii</i> | 30TYL4117 | 40.773 / -0.138 | BDBV ( <a href="http://www.bdb.gva.es/">http://www.bdb.gva.es/</a> ); previous study of allozymes [2] |
| <i>P. pardoii</i> | 30TYL4616 | 40.763 / -0.080 | <i>Nuevos datos para la flora de Aragón</i> [4]                                                       |
| <i>P. pardoii</i> | 30TYL3919 | 40.792 / -0.161 | Previous study of allozymes [2]                                                                       |
| <i>P. pardoii</i> | 30TYL3820 | 40.801 / -0.173 | Previous study of allozymes [2]                                                                       |
| <i>P. pardoii</i> | 30TYL3920 | 40.801 / -0.161 | Previous study of allozymes [2]                                                                       |

1. Guardiola, M.; Sáez, L. *Petrocoptis montsiciana* O. Bolòs & Rivas Mart. In *Atlas y Libro Rojo de la Flora Vascular Amenazada de España* [1] - Adenda 2017. J.C. Moreno Saiz, J.M. Iriondo Alegría, F. Martínez García, J. Martínez Rodríguez, C. Salazar Mendiás, Eds. Ministerio para la Transición Ecológica-Sociedad Española de Biología de la Conservación de Plantas: Madrid, Spain, 2019; pp. 134–135.
2. López-Pujol, J.; Bosch, M.; Simon, J.; Blanché, C. Allozyme diversity of two endemic *Petrocoptis* species: *P. montsiciana* and its close relative *P. pardoii* (Caryophyllaceae). *Can. J. Bot.* **2001**, *79*, 1379–1389.
3. Red de seguimiento para especies de flora y hábitats de interés comunitario en Aragón, LIFE12 NAT/ES/000180 RESECOM. *Petrocoptis montsiciana* O. Bolòs & Rivas Mart. 2014. Available at:

[http://www.liferesecom.ipe.csic.es/eic/Petrocoptis%20montsicciana%20\\_LIFE.doc](http://www.liferesecom.ipe.csic.es/eic/Petrocoptis%20montsicciana%20_LIFE.doc) (accessed on 27<sup>th</sup> December 2020).

4. López, S.; Fabregat, C. Nuevos datos para la flora de Aragón. *Fl. Montib.* **2011**, *49*, 85–95.

**Table S2.** Comparison of average (SD) of individual climatic values between *Petrocoptis montsicciana* (60 occurrences) and *P. pardoi* (31 occurrences). Results from Wilcoxon-Mann-Whitney test are also specified. Significant differences are marked in bold.

|                                        | <b>bio3</b>             | <b>bio6</b>           | <b>bio7</b>              | <b>bio8</b>          | <b>bio9</b>          | <b>bio15</b>            | <b>bio19</b>               |
|----------------------------------------|-------------------------|-----------------------|--------------------------|----------------------|----------------------|-------------------------|----------------------------|
| <i>P. montsicciana</i><br>average (SD) | 36.7 (0.6)              | −0.4 (1.0)            | 29.0 (0.5)               | 13.3 (1.8)           | 5.5 (1.2)            | 23.4 (2.0)              | 135.8 (27.8)               |
| <i>P. pardoi</i><br>average (SD)       | 42.2 (0.4)              | −0.7 (0.6)            | 30.3 (0.35)              | 14.2 (0.6)           | 6.2 (0.5)            | 31.0 (0.5)              | 89.3 (2.5)                 |
| W ( <i>p</i> -value)                   | 0<br><b>(&lt; 0.00)</b> | 1204<br><b>(0.02)</b> | 15<br><b>(&lt; 0.00)</b> | 683<br><b>(0.04)</b> | 682<br><b>(0.04)</b> | 0<br><b>(&lt; 0.00)</b> | 1860<br><b>(&lt; 0.00)</b> |

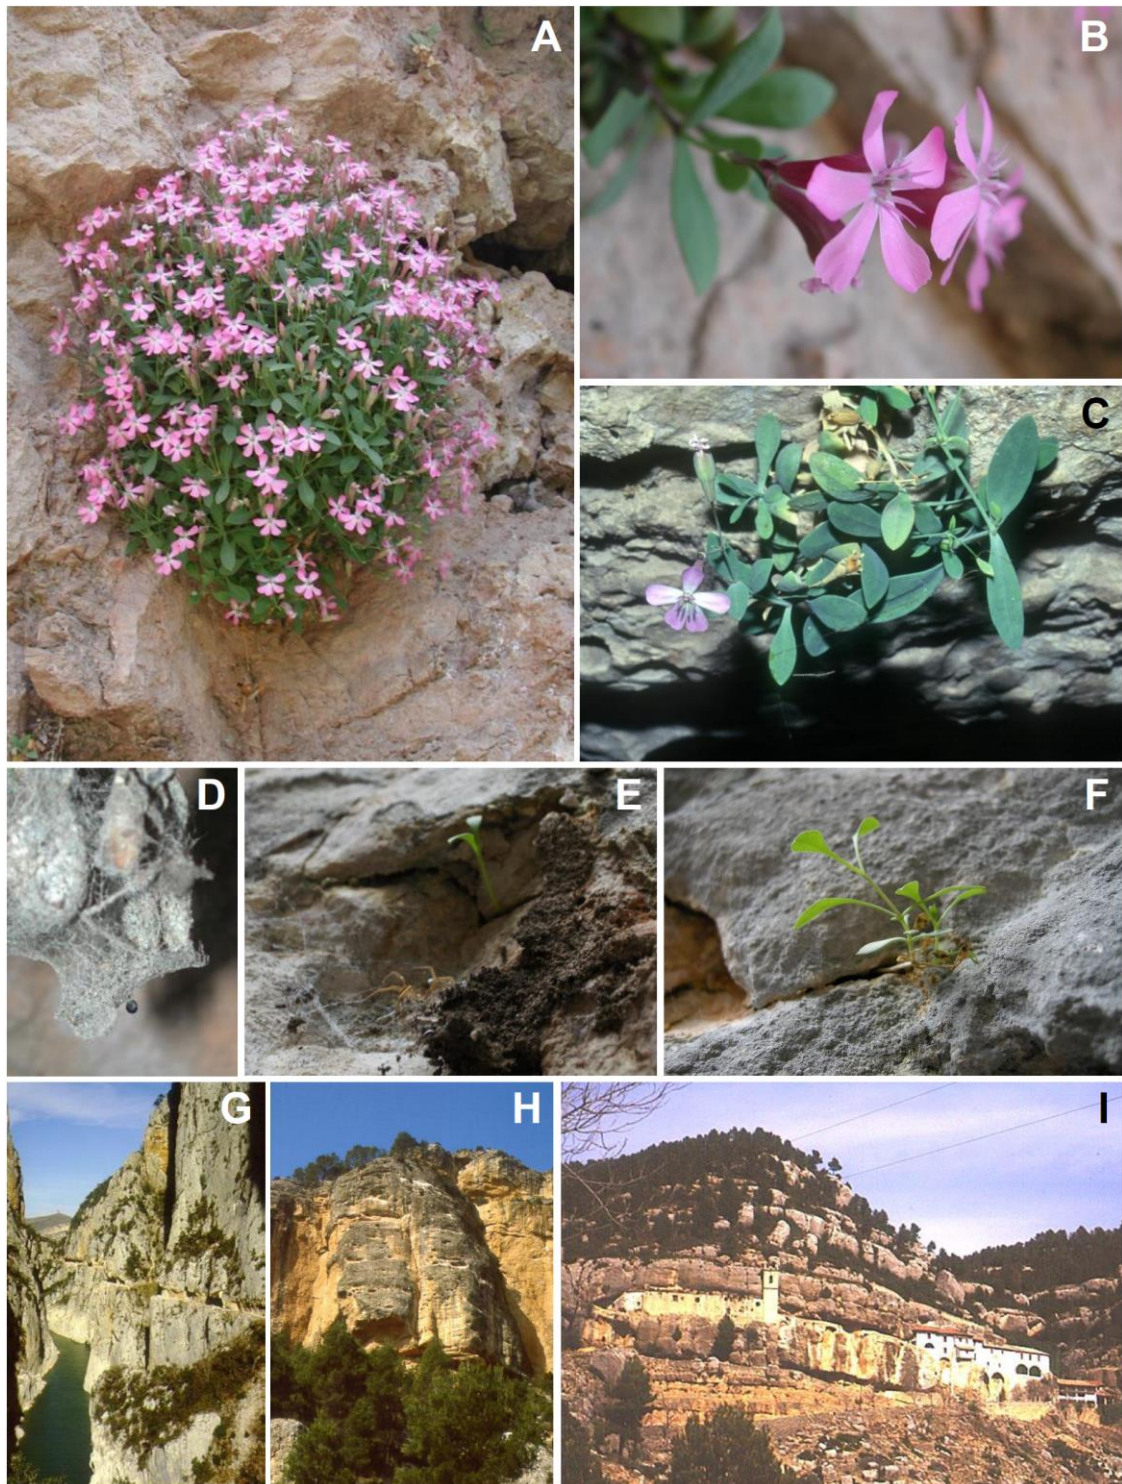

**Figure S1.** General aspect of *Petrocoptis montsicciana*, *P. pardoii* and their habitats. (A) and (B), flowering individual of *P. montsicciana* and details of the flower, respectively, from Santa Maria de Salgar sanctuary in Foradada (Catalonia); (C), flowering individual of *P. pardoii* from Zorita del Maestrazgo (Valencian Community); (D), spider web acting as a receptacle for *Petrocoptis* seeds, which may allow plant recruitment (E); (F), young individual growing in a rock fissure (pictures D, E and F are from Santa Maria de Salgar sanctuary); (G), Mont-rebei pass (Aragon/Catalonia), where several populations of *P. montsicciana* are located within or around; (H), Cantal Badat in Zorita del Maestrazgo, home of a population of a few hundred individuals of *P. pardoii*; and (I), Mare de Déu de la Balma sanctuary in Zorita del Maestrazgo, *locus classicus* of *P. pardoii*. All photographs were taken by Jordi López-Pujol except C (Emilio Laguna).

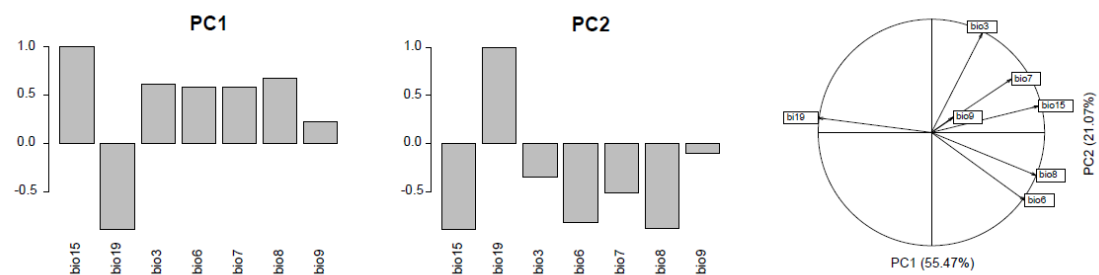

**Figure S2.** Contribution of each environmental variable to the spatial distribution of the PCA-env and direction of the seven climatic variables to the first to PCA-env axes.
